## A resource of targeted mutant mouse lines for 5,061 genes

Marie-Christine Birling<sup>1</sup>, Atsushi Yoshiki<sup>2</sup>, David J Adams<sup>3</sup>, Shinya Ayabe<sup>2</sup>, Arthur L Beaudet<sup>4</sup>, Joanna Bottomley<sup>3</sup>, Allan Bradley<sup>3,25</sup>, Steve DM Brown<sup>5</sup>, Antje Bürger<sup>6</sup>, Wendy Bushell<sup>3,26</sup>, Francesco Chiani<sup>7</sup>, Hsian-Jean Genie Chin<sup>8</sup>, Skevoulla Christou<sup>9</sup>, Gemma F Codner<sup>9</sup>, Francesco J DeMayo<sup>4,27</sup>, Mary E Dickinson<sup>4</sup>, Brendan Doe<sup>3</sup>, Leah Rae Donahue<sup>10</sup>, Martin D Fray<sup>9</sup>, Alessia Gambadoro<sup>7</sup>, Xiang Gao<sup>11</sup>, Marina Gertsenstein<sup>12</sup>, Alba Gomez-Segura<sup>14</sup>, Leslie O Goodwin<sup>10</sup>, Jason D Heaney<sup>4</sup>, Yann Hérault<sup>1</sup>, Martin Hrabe de Angelis<sup>15,16</sup>, Si-Tse Jiang<sup>8</sup>, Monica J Justice<sup>4,12,13</sup>, Petr Kasperek<sup>17</sup>, Ruairidh E King<sup>5</sup>, Ralf Kühn<sup>6,28,29</sup>, Ho Lee<sup>18</sup>, Young Jae Lee<sup>19</sup>, Zhiwei Liu<sup>20</sup>, K C Kent Lloyd<sup>21</sup>, Isabel Lorenzo<sup>4</sup>, Ann-Marie Mallon<sup>5</sup>, Colin McKerlie<sup>12,13</sup>, Terrence F Meehan<sup>14</sup>, Stuart Newman<sup>3</sup>, Lauryl MJ Nutter<sup>12,13</sup>, Goo Taeg Oh<sup>22</sup>, Guillaume Pavlovic<sup>1</sup>, Ramiro Ramirez-Solis<sup>3</sup>, Barry Rosen<sup>3,30</sup>, Edward J Ryder<sup>3,31</sup>, Luis A Santos<sup>5</sup>, Joel Schick<sup>6</sup>, John R Seavitt<sup>4</sup>, Radislav Sedlacek<sup>17</sup>, Claudia Seisenberger<sup>6</sup>, Je Kyung Seong<sup>23</sup>, William C Skarnes<sup>3,33</sup>, Tania Sorg<sup>1</sup>, Karen P Steel<sup>3,32</sup>, Masaru Tamura<sup>2</sup>, Glauco P Tocchini-Valentini<sup>7</sup>, Chi-Kuang Leo Wang<sup>8</sup>, Hannah Wardle-Jones<sup>3</sup>, Marie Wattenhofer-Donzé<sup>1</sup>, Sara Wells<sup>9</sup>, Brandon J Willis<sup>21</sup>, Joshua A Wood<sup>21</sup>, Wolfgang Wurst<sup>6,24</sup>, Ying Xu<sup>20</sup>, IMPC Consortium<sup>35</sup>, Lydia Teboul<sup>9,36</sup>, Stephen A Murray<sup>10,37</sup>

1 Université de Strasbourg, CNRS, INSERM, PHENOMIN-ICS, IGBMC, 1 rue Laurent Fries, 67404 Illkirch, France

2 RIKEN BioResource Research Center, 3-1-1 Koyadai, Tsukuba, Ibaraki 305-0074, Japan

3 Wellcome Sanger Institute, Genome Campus, Hinxton, CB10 1SA, UK

4 Baylor College of Medicine, One Baylor Plaza, Houston, TX, 77030, USA

5 MRC Harwell Institute, Mammalian Genetics Unit, Harwell Campus, Oxfordshire, OX11 0RD, UK

6 Institute of Developmental Genetics, Helmholtz Zentrum München, German Research Center for Environmental Health GmbH, Ingolstaedter Landstrasse 1, 85764 Neuherberg, Germany

7 Monterotondo Mouse Clinic, Italian National Research Council (CNR), Institute of Cell Biology and Neurobiology, I-00015, Monterotondo Scalo, Italy

8 National Laboratory Animal Center, National Applied Research Laboratories (NARLabs), 128 Yen-Chiou-Yuan Rd., Sec. 2, Nankang, Taipei, 11529, Taiwan

9 MRC Harwell Institute, The Mary Lyon Centre, Harwell Campus, Oxfordshire, OX11 0RD, UK

10 The Jackson Laboratory, 600 Main Street, Bar Harbor, Maine 04609, USA

11 SKL of Pharmaceutical Biotechnology and Model Animal Research Center, Collaborative Innovation Center for Genetics and Development, Nanjing Biomedical Research Institute, Nanjing University, 210061, Nanjing, China.

12 The Centre for Phenogenomics, 25 Orde Street, Toronto, Ontario, M5T 3H7, Canada

13 The Hospital for Sick Children, 555 University Avenue, Toronto, Ontario, M5G 1X8, Canada

14 European Molecular Biology Laboratory, European Bioinformatics Institute, Wellcome Trust Genome Campus, Hinxton, Cambridge, CB10 1SD, UK

15 German Mouse Clinic, Institute of Experimental Genetics, Helmholtz Zentrum München, German Research Center for Environmental Health GmbH, Ingolstaedter Landstrasse 1, 85764, Neuherberg, Germany

16 Experimental Genetics, Center of Life and Food Sciences Weihenstephan, Technische Universität München, Freising-Weihenstephan, Germany

17 Czech Centre for Phenogenomics, Institute of Molecular Genetics of the Czech Academy of Sciences, Prumyslova 595, Vestec, Czech Republic

18 Korea Mouse Phenotyping Consortium (KMPC) and Graduate School of Cancer Science and Policy, National Cancer Center: 323 Ilsan-ro, Goyang, Gyeonggi 10408, Republic of Korea

19 Korea Mouse Phenotyping Consortium (KMPC) and Lee Gil Ya Cancer and Diabetes Institute, Gacheon University: 155 Gaetbeol-ro, Yeonsu-gu, Incheon 21999, Republic of Korea

20 CAM-SU Genomic Resource Center, Soochow University, 199 Renai Road, Suzhou, China

21 Mouse Biology Program, University of California, Davis, California, 95618, USA

22 Immune and Vascular Cell Network Research Center, National Creative Initiatives and Department of Life Sciences, Ewha Womans University, 52 Ewhayeodae-gil, Seodaemun-gu, Seoul 03760, Republic of Korea

23 Korea Mouse Phenotyping Consortium (KMPC) and BK21 Program for Veterinary Science, Research Institute for Veterinary Science, College of Veterinary Medicine, Seoul National University, 599 Gwanangno, Gwanak-gu, Seoul 08826, Republic of Korea

24 Developmental Genetics, Center of Life and Food Sciences Weihenstephan, Technische Universität München, Freising-Weihenstephan, Germany

25 Current affiliation: Cambridge Institute of Therapeutic Immunology & Infectious Disease (CITIID), Jeffrey Cheah Biomedical Centre, Cambridge Biomedical Campus, University of Cambridge, Puddicombe Way, Cambridge, CB2 0AW, UK

26 Current affiliation: IONTAS Ltd, Unit 2, Iconix Park, London Road, Cambridge CB22 3EG, UK

27 Current affiliation: National Institute for Environmental Health Science Research Triangle Park NC, USA

28 Current affiliation: Max Delbrueck Center for Molecular Medicine, Berlin, Germany

29 Current affiliation: Berlin Institute of Health, Berlin, Germany

30 Current affiliation: AstraZeneca, Discovery Sciences, Cambridge, UK

31 Current affiliation: LGC Newmarket Road Fordham Cambridgeshire CB7 5WW, UK

32 Current affiliation: Wolfson Centre for Age-Related Diseases, King's College London, Guy's Campus, London SE1 1UL, UK

33 Current affiliation: The Jackson Laboratory for Genomic Medicine, Farmington, CT

34 Current affiliation: PetMedix Ltd, Antibody Innovation in Animal Health, Granta Park, Cambridge CB21 6GS

35 Complete list of additional contributors available in the Supplemental Material

36 Correspondence: [l.teboul@har.mrc.ac.uk](mailto:l.teboul@har.mrc.ac.uk)

37 Correspondence: [steve.murray@jax.org](mailto:steve.murray@jax.org)

## Abstract

The International Mouse Phenotyping Consortium reports the generation of new mouse mutant strains for over 5,000 genes from targeted embryonic stem cells on the C57BL/6N genetic background. This includes 2,850 null alleles for which no equivalent mutant mouse line exists, 2,987 novel conditional-ready alleles, and 4,433 novel reporter alleles. This nearly triples the number of genes with reporter alleles and almost doubles the number of conditional alleles available to the scientific community. When combined with more than 30 years of community effort, the total mutant allele mouse resource covers more than half of the genome. The extensively validated collection is archived and distributed through public repositories, facilitating availability to the worldwide biomedical research community, and expanding our understanding of gene function and human disease.

## Results and Discussion

Despite thirty years of mouse targeted mutagenesis, *in vivo* function of the majority of genes in the mouse genome are still unknown. This reflects the observation that a small number of genes have been the object of intensive study including the development of multiple mouse models, while a significant proportion of the coding genome remains entirely unexplored<sup>1</sup>. The completion of the sequencing of the mouse genome, coupled with the use of mouse embryonic stem (ES) cells for gene targeting to create complex mutant alleles, presented an opportunity to functionally analyze all the protein coding genes of a mammalian species<sup>2,3</sup>. Taking advantage of comprehensive manual annotation of the genome<sup>4</sup>, the International Knockout Mouse Consortium (IKMC) systematically generated single-gene, reporter-tagged null alleles for protein-coding genes by homologous recombination in mouse ES cells<sup>5,6</sup>.

Subsequently, large-scale mouse production and phenotyping programs deployed these unique resources, establishing the feasibility of genome-scale mouse production and phenotyping<sup>7-9</sup>. Building upon these successes, the International Mouse Phenotyping Consortium (IMPC) was established to coordinate a network of programs around the globe, assuring uniformity and reproducibility of these efforts, including standardization of phenotyping protocols and the use of a single inbred mouse strain background, C57BL/6N, with the ultimate goal of generating and phenotyping a single-gene knockout (KO) mouse line for every protein-coding gene in the genome.

Production of KO mice began in concert with the expansion of the ES cell library, but rapidly accelerated after 2011 with the funding of multiple IMPC programs. To date, more than 17,500 individual production attempts (microinjection or aggregation) have resulted in the germline transmission of KO alleles for 5,061 unique genes (**Figure 1A; Supplemental Table ST1**). These lines have been expanded for phenotyping, providing key insights into mammalian biology and disease<sup>10-15</sup>; [www.mousephenotype.org](http://www.mousephenotype.org)). The IMPC contribution extends the total number of genes with targeted KO alleles produced by the scientific community from the 8,391 reported and curated by Mouse Genome Informatics (MGI;<sup>16</sup>)(**Figure 1B; Supplemental Table ST2**), to 11,241, or more than half of the genome. Much of the overlap (2,211 genes) reflects specific community requests for the production of novel complex alleles (see below), targeting on an inbred C57BL/6N background, or for mutant mouse lines unavailable through public repositories. The growing use of CRISPR/Cas9 editing to produce null alleles for the IMPC led to the decrease in ES cell-based production beginning in 2015.

While the primary goal of the IKMC and IMPC was to generate and phenotype a null allele for every protein-coding gene, the mutant alleles included additional functional features. All alleles included a *lacZ* reporter cassette to facilitate analysis of gene transcription *in situ* (**Supplemental Figure S1**;<sup>5,6</sup>). A large proportion of the alleles have conditional potential, providing future users with a useful tool for detailed, mechanistic analyses (Supplemental Figure S1a). The multifunctional utility of the alleles produced by the IMPC has greatly expanded the repertoire of genetic resources available to the scientific community. Of the 3,674 unique gene, conditional-ready mouse models generated and validated, 2,987 were novel alleles for genes without an existing conditional allele (81.3%). These nearly double the total number of genes with conditional KO alleles produced by the scientific community

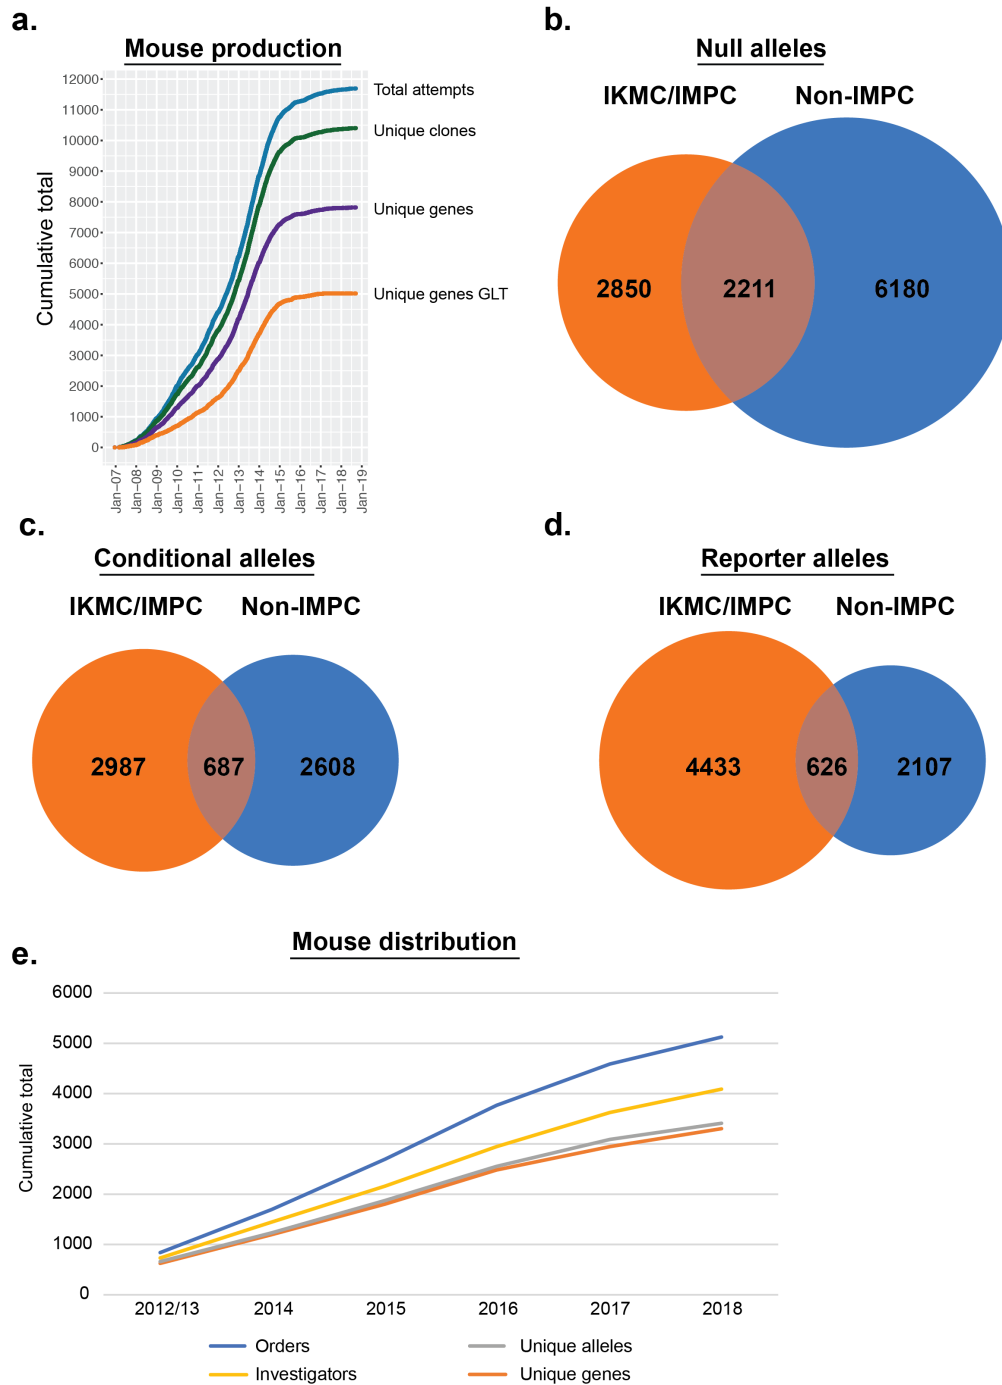

**Figure 1:** Generation and impact of targeted alleles for 5,061 unique mouse genes. (a) Cumulative production progress, including all attempts (microinjection or aggregation (black), unique ES cell clones injected (red), unique genes attempted (yellow), and unique genes that achieved germline transmission (GLT; blue). For GLT, the date reflects the date of microinjection, and only reports the first instance of transmission for the small number of duplicate mutations produced. (b) Venn representation of unique gene null alleles produced by the IMPC (orange) and by the rest of the scientific community as reported in MGI (“Non-IMPC”; blue). (c) Unique gene conditional-ready alleles produced by the IMPC (orange) and by the rest of the scientific community (blue). (d) Unique gene reporter alleles produced by the IMPC (orange) and by the rest of the scientific community (blue). (e) Cumulative mouse orders of IMPC lines processed by production centres and mouse model Repositories from 2012-2018 (blue line). The cumulative number of ordering investigators, unique alleles ordered, and unique genes ordered are shown in yellow, grey, and orange, respectively.

as a whole (2,987 IMPC conditional alleles added to the 3,295 conditional alleles reported in MGI as mouse lines; **Figure 1C**). The impact is even more significant for reporter alleles. The IMPC has produced reporter alleles for 5,059 unique genes, of which 4,433 are novel (87.6%), complementing the 2,733 produced by the scientific community (**Figure 1D**). This has nearly tripled the total number of genes with reporter alleles available to the community as mouse lines.

The generation of mouse lines was underpinned by comprehensive quality control strategies for both ES cell karyotype and targeted allele, which ensured efficient production and integrity of the targeting event (**Supplemental Table ST1 and ST2; Supplemental Figures S2 and S3**). Further quality control (QC) analysis also revealed that part of the ES cell collection contained an additional insertion of a wild-type *nonagouti* (*A*) gene on chromosome 8, likely introduced with the targeted reversion event in these cell lines (subclone JM8A3<sup>17</sup>). However, as the insertion of the wild-type *nonagouti* gene results in an agouti coat color, this allele can be easily segregated from the mutant allele in most cases (**Supplemental Figure S4**). High-throughput allele validation of ES cells was performed using either a suite of quantitative and endpoint PCR-based tests or a combination of Southern blot and PCR-based analysis, depending on production centre (**Supplemental Figure S2, S3 and S5 and Supplemental Tables ST3 and ST4 and Methods**). Despite these efforts, we found that additional quality control (QC) on the mouse lines themselves was required to ensure all IMPC lines resulted from the transmission of the correctly targeted allele (**Supplemental Table ST5; <sup>18</sup>**). This additional QC at the mouse level identified a small but significant proportion of incorrect alleles that transmitted through the germline of chimera mice derived from clones that had passed initial and secondary validation QC testing in the ES cell. Our experience highlights the importance of careful allele validation before and after mouse production.

As a result of this effort, mouse lines with targeted alleles for more than 5,000 genes on a C57BL/6N genetic background with extensive and documented genetic validation of the targeted locus are now available to the biomedical research community, supporting high standards of reproducibility for future investigations. The IMPC resource has shown its usefulness through the continued and robust uptake of mutant mouse lines by investigators around the world. This includes both KO and conditional alleles with mouse lines distributed as live mice and cryopreserved stocks. To date, over 5,000 orders for mutant mice for 3,301

unique genes have been processed and shipped to more than 4,000 investigators around the world (**Figure 1E**). To date, more than 1,900 publications acknowledge the use of EUCOMM/KOMP alleles (for example <sup>19-30</sup>). This demonstrates the utility of these resources, the cumulative use of which continues to grow over time, and complements the systematic phenotyping efforts of IMPC centres. In the new era of genome editing, this ES cell-derived collection remains of unique value as it offers particularly sophisticated and quality-controlled alleles representing a cornerstone of the collective development of a null allele resource for the complete mammalian genome <sup>2</sup>.

### **Data availability**

All data are freely available from the IMPC database hosted at EMBL-EBI via a web portal ([mousephenotype.org](http://mousephenotype.org)), ftp (<ftp://ftp.ebi.ac.uk/pub/databases/impc>) and automatic programmatic interfaces. An archived version of the database will be maintained after cessation of funding (exp. 2021) for an additional 5 years. Information on alleles, together with phenotype summaries, are additionally archived with Mouse Genome Informatics at the Jackson Laboratory via direct data submissions (J:136110, J:148605, J:157064, J:157065, J:188991, J:211773).

### **Acknowledgments**

We thank all technical personnel at the different centres involved in this project for their contribution. We thank Gareth Clarke for support with illustrations. M.-C.B., G.P., M. W.-D., Y.H., T.S., were supported by the Université de Strasbourg, the CNRS, the INSERM and the programmes ‘Investissements d’avenir’ (ANR-10-IDEX-0002-02, ANR-10-LABX-0030-INRT, ANR-10-INBS-07 PHENOMIN), A.Y. and M.T. were supported by RIKEN BioResource Research Center (BRC), Management Expenses Grant from the Ministry of Education, Culture, Sports, Science and Technology (MEXT), D.A, J.B., A.B., W.B, B.D., S.N, R.R.S., B.R., E.R., W.S., K.S. and H.W.-J. were supported by the Wellcome Trust, S.B., S.C., G. C., M.F., S.W. and L.T. were supported by the Medical Research Council, C.McK. and L.N. were supported by Genome Canada and Ontario Genomics (OGI-051), ), H.L., Y.J.L., G.T.O., J.K.S. supported by National Research Foundation (2014M3A9D5A01074636, 2014M3A9D5A01075128), Republic of Korea (KMPC), M.B., A. B., S.B., A.B., W.B., F.C., M.F., A.G., M. H. A., R. K., S.N., G.P., R.R.S., B.R., E.R., J.S., W.S., C.S., T.S., G.T.-V, S.W., W.W. and L.T. were supported by the European Commission (EUCOMM, EUMODIC, Infrafrontier). R.S. and P.K. were supported by RVO

68378050 by Academy of Sciences of the Czech Republic and by LM2015040 (Czech Centre for Phenogenomics), CZ.1.05/2.1.00/19.0395, CZ.1.05/1.1.00/02.0109 funded by the Ministry of Education, Youth and Sports and the European Regional Development Fund. Work was supported by the National Key R&D Program of China 2018YFA0801100 to Y.X. Research reported in this publication was supported by the NIH Common Fund, the Office of The Director, and the National Human Genomic Research Institute of the National Institutes of Health under Award Numbers (U42OD011174 supported J.B., A.B., W.B., B.D., M.D., M.F., J. H., M. J., I.L., F.M., S.N, R.R.S. B.R. E.R. W.S., J.S., S.W.; U42OD011175 supported M.G., C.McK., L.N., B.W., J.W, K.C.L.; U42OD011185 supported L.R.D., L. G. and S.A.M.; U54HG006370-02 supported A. G-S., R. K., A.-M.M., T.M., L.S.). The content is solely the responsibility of the authors and does not necessarily represent the official views of the National Institutes of Health.

### Author Contributions

M-C.B., A.Y., S.A., J.B., A.Bu., W.B., F.C., S.C., G.F.C., F.J.D., B.D., M.D.F., A.G., M.G., A.G-S., L.O.G., R.E.K., R.K., H.L., Y.J.L., I.L., A-M. M., C.M., T.F.M., S.N., L.M.J.N., G.T.O., G.P., R.R-S., B.R., E.J.R., L.A.S., J.S., J.R.S., C.S., H.W-J., M.W-D., B.J.W., J.A.W., L.T., and S.A.M generated data, developed data tools and databases, and/or carried out data and statistical analyses; A.Y., D.J.A., A.L.B, A.B., S.D.M.B., H-J.G.C., M.E.D., L.R.D., X.G., J.D.H., Y.H., M.H.A., S-T.J., M.J.J., Z.L., K.C.K.L., J.K.S., W.C.S., T.S., K.P.S., M.T., G.P.T-V., C-K.L.W., S.W., W.W., Y.X., L.T., and S.A.M. directed research at their respective institutions; M-C B., L.T., and S.A.M wrote the paper.

**Competing interests:** The authors declare no competing interests.

**Additional Information:** Supplementary Methods, Figures, and Tables accompany this manuscript.

### References

1. Stoeger, T., Gerlach, M., Morimoto, R.I. & Nunes Amaral, L.A. Large-scale investigation of the reasons why potentially important genes are ignored. *PLoS Biol* **16**, e2006643 (2018).
2. Austin, C.P. *et al.* The knockout mouse project. *Nat Genet* **36**, 921-4 (2004).
3. Auwerx, J. *et al.* The European dimension for the mouse genome mutagenesis program. *Nat Genet* **36**, 925-7 (2004).



4. Ashurst, J.L. *et al.* The Vertebrate Genome Annotation (Vega) database. *Nucleic Acids Res* **33**, D459-65 (2005).
5. Skarnes, W.C. *et al.* A conditional knockout resource for the genome-wide study of mouse gene function. *Nature* **474**, 337-42 (2011).
6. Valenzuela, D.M. *et al.* High-throughput engineering of the mouse genome coupled with high-resolution expression analysis. *Nat Biotechnol* **21**, 652-9 (2003).
7. de Angelis, M.H. *et al.* Analysis of mammalian gene function through broad-based phenotypic screens across a consortium of mouse clinics. *Nat Genet* **47**, 969-78 (2015).
8. White, J.K. *et al.* Genome-wide generation and systematic phenotyping of knockout mice reveals new roles for many genes. *Cell* **154**, 452-64 (2013).
9. West, D.B. *et al.* A lacZ reporter gene expression atlas for 313 adult KOMP mutant mouse lines. *Genome Res* **25**, 598-607 (2015).
10. Bowl, M.R. *et al.* A large scale hearing loss screen reveals an extensive unexplored genetic landscape for auditory dysfunction. *Nat Commun* **8**, 886 (2017).
11. Dickinson, M.E. *et al.* High-throughput discovery of novel developmental phenotypes. *Nature* **537**, 508-514 (2016).
12. Karp, N.A. *et al.* Prevalence of sexual dimorphism in mammalian phenotypic traits. *Nat Commun* **8**, 15475 (2017).
13. Meehan, T.F. *et al.* Disease model discovery from 3,328 gene knockouts by The International Mouse Phenotyping Consortium. *Nat Genet* **49**, 1231-1238 (2017).
14. Munoz-Fuentes, V. *et al.* The International Mouse Phenotyping Consortium (IMPC): a functional catalogue of the mammalian genome that informs conservation. *Conserv Genet* **19**, 995-1005 (2018).
15. Rozman, J. *et al.* Identification of genetic elements in metabolism by high-throughput mouse phenotyping. *Nat Commun* **9**, 288 (2018).
16. Bult, C.J. *et al.* Mouse Genome Database (MGD) 2019. *Nucleic Acids Res* **47**, D801-D806 (2019).
17. Pettitt, S.J. *et al.* Agouti C57BL/6N embryonic stem cells for mouse genetic resources. *Nat Methods* **6**, 493-5 (2009).
18. Ryder, E. *et al.* Molecular characterization of mutant mouse strains generated from the EUCOMM/KOMP-CSD ES cell resource. *Mamm Genome* **24**, 286-94 (2013).
19. Ingham, N.J. *et al.* Mouse screen reveals multiple new genes underlying mouse and human hearing loss. *PLoS Biol* **17**, e3000194 (2019).
20. Liu, X. *et al.* The complex genetics of hypoplastic left heart syndrome. *Nat Genet* **49**, 1152-1159 (2017).
21. Miyata, H. *et al.* Genome engineering uncovers 54 evolutionarily conserved and testis-enriched genes that are not required for male fertility in mice. *Proc Natl Acad Sci U S A* **113**, 7704-10 (2016).
22. Pol, A. *et al.* Mutations in SELENBP1, encoding a novel human methanethiol oxidase, cause extraoral halitosis. *Nat Genet* **50**, 120-129 (2018).
23. Small, K.S. *et al.* Regulatory variants at KLF14 influence type 2 diabetes risk via a female-specific effect on adipocyte size and body composition. *Nat Genet* **50**, 572-580 (2018).
24. Akawi, N. *et al.* Discovery of four recessive developmental disorders using probabilistic genotype and phenotype matching among 4,125 families. *Nat Genet* **47**, 1363-9 (2015).
25. Bertero, A. *et al.* Activin/nodal signaling and NANOG orchestrate human embryonic stem cell fate decisions by controlling the H3K4me3 chromatin mark. *Genes Dev* **29**, 702-17 (2015).

26. de la Rosa, J. *et al.* A single-copy Sleeping Beauty transposon mutagenesis screen identifies new PTEN-cooperating tumor suppressor genes. *Nat Genet* **49**, 730-741 (2017).
27. Kim, J.H. *et al.* Regulation of the catabolic cascade in osteoarthritis by the zinc-ZIP8-MTF1 axis. *Cell* **156**, 730-43 (2014).
28. Koch, S., Acebron, S.P., Herbst, J., Hatiboglu, G. & Niehrs, C. Post-transcriptional Wnt Signaling Governs Epididymal Sperm Maturation. *Cell* **163**, 1225-1236 (2015).
29. Kochubey, O., Babai, N. & Schneggenburger, R. A Synaptotagmin Isoform Switch during the Development of an Identified CNS Synapse. *Neuron* **90**, 984-99 (2016).
30. Lin, C.J., Koh, F.M., Wong, P., Conti, M. & Ramalho-Santos, M. Hira-mediated H3.3 incorporation is required for DNA replication and ribosomal RNA transcription in the mouse zygote. *Dev Cell* **30**, 268-79 (2014).
